# Supplementary material for: Climate change effects on river droughts in Bavaria using a hydrological large ensemble
Source: Copernicus journal article supplement (doi:10.5194/egusphere-2025-2483), 2025-06-24
Supplement: Supplementary file 1 [file egusphere-2025-2483-supplement.pdf]

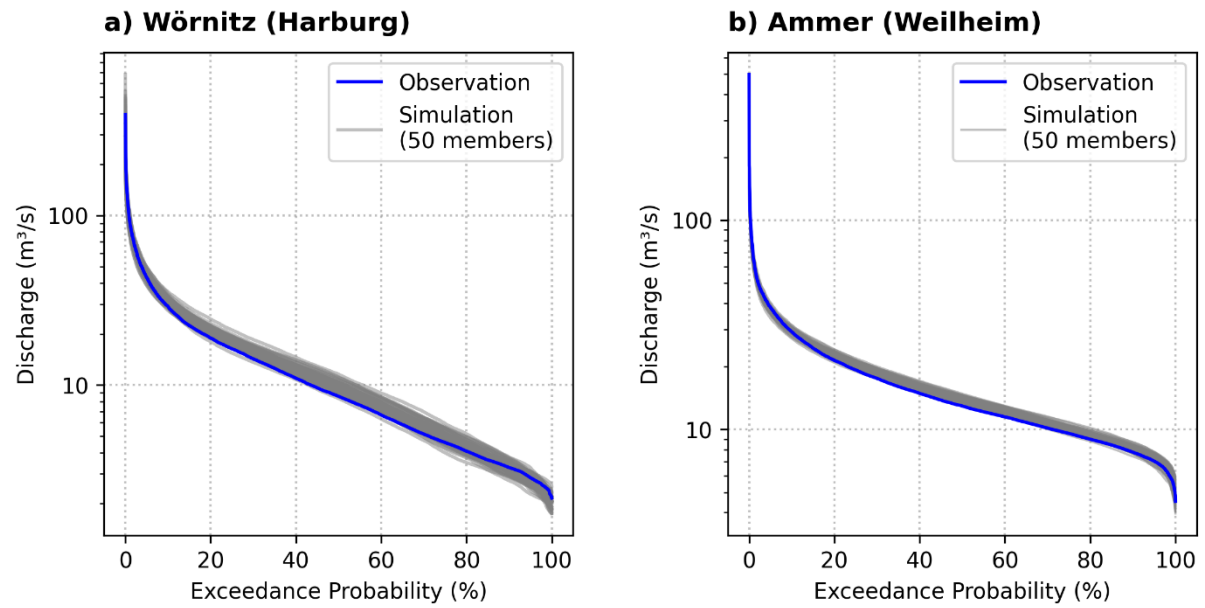

**Figure S1: Flow duration curves for the Wörnitz (a) and Ammer (b) catchments. Blue lines are based on observations in the period 1981 – 2010. The grey lines represent the 50 members of the WaSiM-LE simulations.**

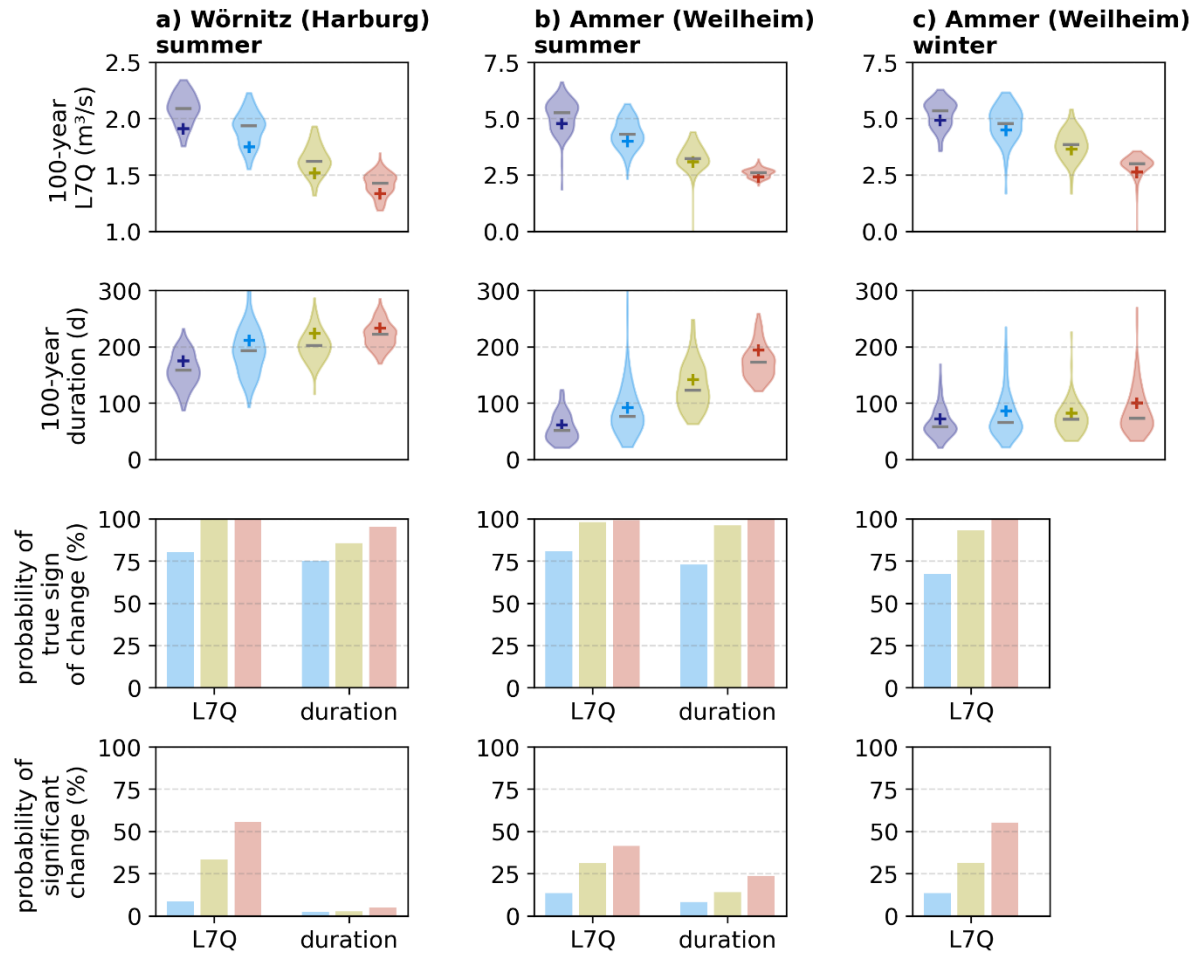

**Figure S2: Bootstrap experiment: How would the respective 100-yr return levels of L7Q and event duration look like based on a single 30-year period? Violin plots indicate the range of 100 bootstrap iterations, where the cross denotes the “best estimation” based on the whole 50 members. Barplots (third row) show the probability to detect the “true” sign of change, when comparing CUR, NF, and FF to REF. Barplots (fourth row) indicate the probability that the detected change with one member is significant. Significant changes are defined by the estimation for the CUR, NF, FF 100-year return levels is outside the 95% confidence intervals of the REF (see Fig. 6 of the main article).**
